# Supplementary material
Source: PubMed Central journal article supplement (PMC3638174)
Supplement: supp_amiajnl-2011-000796_Appendix_1.pdf [file supp_amiajnl-2011-000796_Appendix_1.pdf]

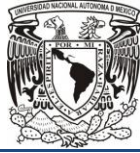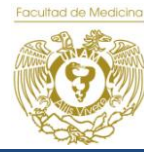

## OUTCOME COMPETENCIES

### UNAM FACULTY OF MEDICINE

Graduates of UNAM Faculty of Medicine will have achieved the following 8 competencies:

1. CRITICAL THINKING, CLINICAL JUDGMENT, DECISION MAKING AND INFORMATION MANAGEMENT:
  - Applies critically and reflectively knowledge from various sources of information in the solution of health problems.
  - Utilizes scientific, clinical, epidemiological and social science methodologies, to efficiently respond to healthcare issues in the framework of society's needs.
2. SELF-REGULATED AND LIFELONG LEARNING
  - Practices self-assessment and is aware of his/her potential and limitations to achieve the attitudes, skills and strategies needed to construct their knowledge, keep up to date and advance their professional preparation, all in accordance with current scientific, technological and social development.
  - Identifies the field of professional development including postgraduate training, research and teaching.
3. EFFECTIVE COMMUNICATION
  - Establishes a dialogic, fluid, committed, effective and attentive communication with patients, based on respect for their autonomy, beliefs and cultural values, as well as confidentiality, empathy and trust.
  - Uses a language without technicalities, clear and understandable to patients and their families, in an effort of communication and mutual recognition.
  - Communicates effectively, timely and accurately with her/his peers and members of the healthcare team.
4. KNOWLEDGE AND APPLICATION OF BIOMEDICAL, SOCIOMEDICAL AND CLINICAL SCIENCES IN THE PRACTICE OF MEDICINE
  - Performs her/his clinical practice and decision making based on the informed use of theoretical knowledge, the study of health problems, contact with patients and the more frequent causes of medical care in the area of general medicine.
5. CLINICAL SKILLS IN DIAGNOSIS, PROGNOSIS, TREATMENT AND REHABILITATION
  - Carries out the diagnosis and treatment of the most frequent diseases based on scientific and clinical evidence, establishes the prognosis and rehabilitation of the patient and/or family in an effective, efficient and timely manner.
  - Guides the patient in a timely manner, and refers him/her to the second or third level of medical care when the capacity of the previous level has been exceeded.



### 6. PROFESSIONALISM, ETHICAL ASPECTS AND LEGAL RESPONSIBILITIES

- Performs professional practice based on ethical principles and the relevant legal framework, to provide quality healthcare, with a vocation of service, humanism and social responsibility.
- Identifies conflicts of interest in his/her professional practice and resolves them putting the interests of the patient before his/her own.
- Makes decisions in ethical dilemmas based on knowledge, the legal framework of their professional practice and the perspective of the patient and/or his family to provide quality medical practice.
- Attends to the affective, emotional and behavioral aspects related to the patient's condition, in order to care for their physical and mental integrity, considering age, sex, ethnic and cultural factors.

### 7. POPULATION HEALTH AND HEALTH SYSTEMS: HEALTH PROMOTION AND DISEASE PREVENTION

- Identifies the importance of her/his professional practice within the structure and function of the national health system, so that it leads to an efficient interaction in benefit of the population health.
- Promotes healthy behaviors and disseminates up-to-date information aimed to reduce individual and collective risk factors, participates in community dynamics.
- Applies public health strategies aimed at the community for the promotion of health, prevention of diseases, response to natural disasters or epidemiological emergencies, in a teamwork effort with the healthcare professionals.

### 8. PERSONAL GROWTH AND DEVELOPMENT

- Proposes solutions and makes decisions based on knowledge of self, and strives to overcome her/his limitations and develop his/her capabilities.
- Cultivates self-confidence, assertiveness, tolerance to frustration and uncertainty and incorporates self-criticism and constructive criticism for their personal development and the development of the health care team.
- Recognizes his/her potential and personal limitations, admits her/his mistakes and shows creativity and flexibility in solving problems.
- Exercises leadership effectively in professional settings, demonstrating skills in collaboration with healthcare team members.
- Utilizes the principles of administration and quality improvement in the practice of the profession.
